# Supplementary material for: HpDTC1, a Stress-Inducible Bifunctional Diterpene Cyclase Involved in Momilactone Biosynthesis, Functions in Chemical Defence in the Moss Hypnum plumaeforme
Source: PubMed Central journal article supplement (PMC4853780; doi:10.1038/srep25316), 2016-05-03
Supplement: srep25316-s1.pdf [file srep25316-s1.pdf]

## Supplemental Figures and table

### **HpDTC1, a Stress-Inducible Bifunctional Diterpene Cyclase Involved in Momilactone Biosynthesis, Functions in Chemical Defence in the Moss *Hypnum plumaeforme***

Kazunori Okada<sup>1#</sup>, Hiroshi Kawaide<sup>2#</sup>, Koji Miyamoto<sup>3</sup>, Sho Miyazaki<sup>2</sup>, Ryosuke Kainuma<sup>2</sup>, Honoka Kimura<sup>2</sup>, Kaoru Fujiwara<sup>1</sup>, Masahiro Natsume<sup>2</sup>, Hideaki Nojiri<sup>1</sup>, Masatoshi Nakajima<sup>4</sup>, Hisakazu Yamane<sup>3</sup>, Yuki Hatano<sup>5</sup>, Hiroshi Nozaki<sup>5\*</sup>, and Ken-ichiro Hayashi<sup>5\*</sup>

<sup>#</sup>These authors equally contributed.

\*corresponding authors

#### **Affiliations**

<sup>1</sup> Biotechnology Research Center, The University of Tokyo, Tokyo, 113-8657, Japan.

<sup>2</sup> Graduate School of Agriculture, Tokyo University of Agriculture and Technology, 3-5-8 Saiwaicho, Fuchu, Tokyo 183-8509, Japan

<sup>3</sup> Department of Biosciences, Teikyo University, 1-1 Toyosatodai, Utsunomiya, 320-8551, Japan.

<sup>4</sup> Department of Applied Biological Chemistry, The University of Tokyo, 1-1-1 Yayoi, Bunkyo-ku, Tokyo 113-8657, Japan

<sup>5</sup> Department of Biochemistry, Okayama University of Science, 1-1 Ridai-cho, Okayama 700-0005, Japan.

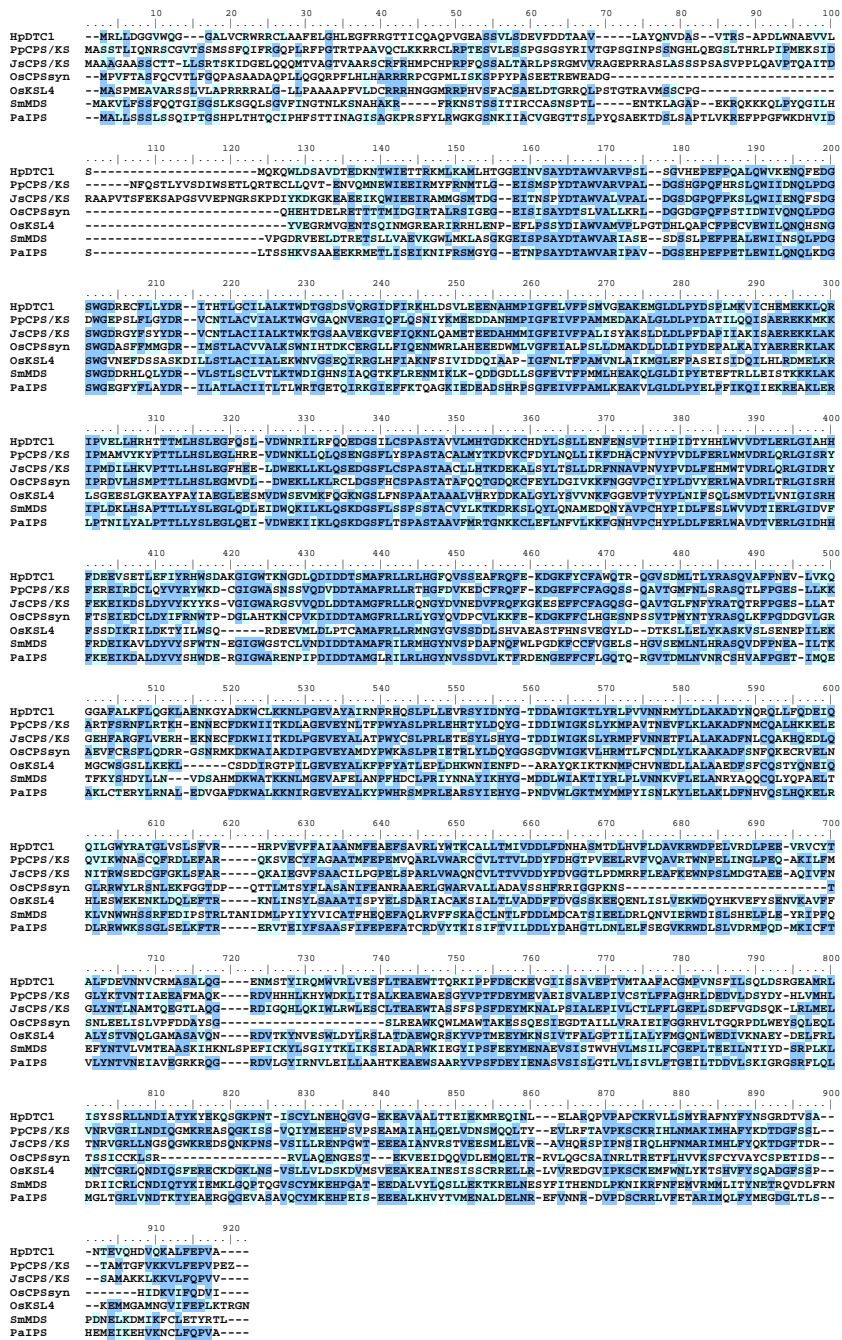

**Supplementary Figure S1. Amino acid sequence alignment of HpDTC1**  
 Moss bifunctional *ent*-kaurene synthase (PpCPS/KS: AB302933.1), liverwort bifunctional *ent*-kaurene synthase (JscPS/KS: BAJ39816), lycophyte bifunctional mitratriadiene synthase (SmMDS: BAL41682), rice monofunctional *syn*-pimaradiene synthase (OskSL4: Q0JEZ8) and gymnosperm bifunctional isopimaradiene synthase (PaIPS: ADZ45512).

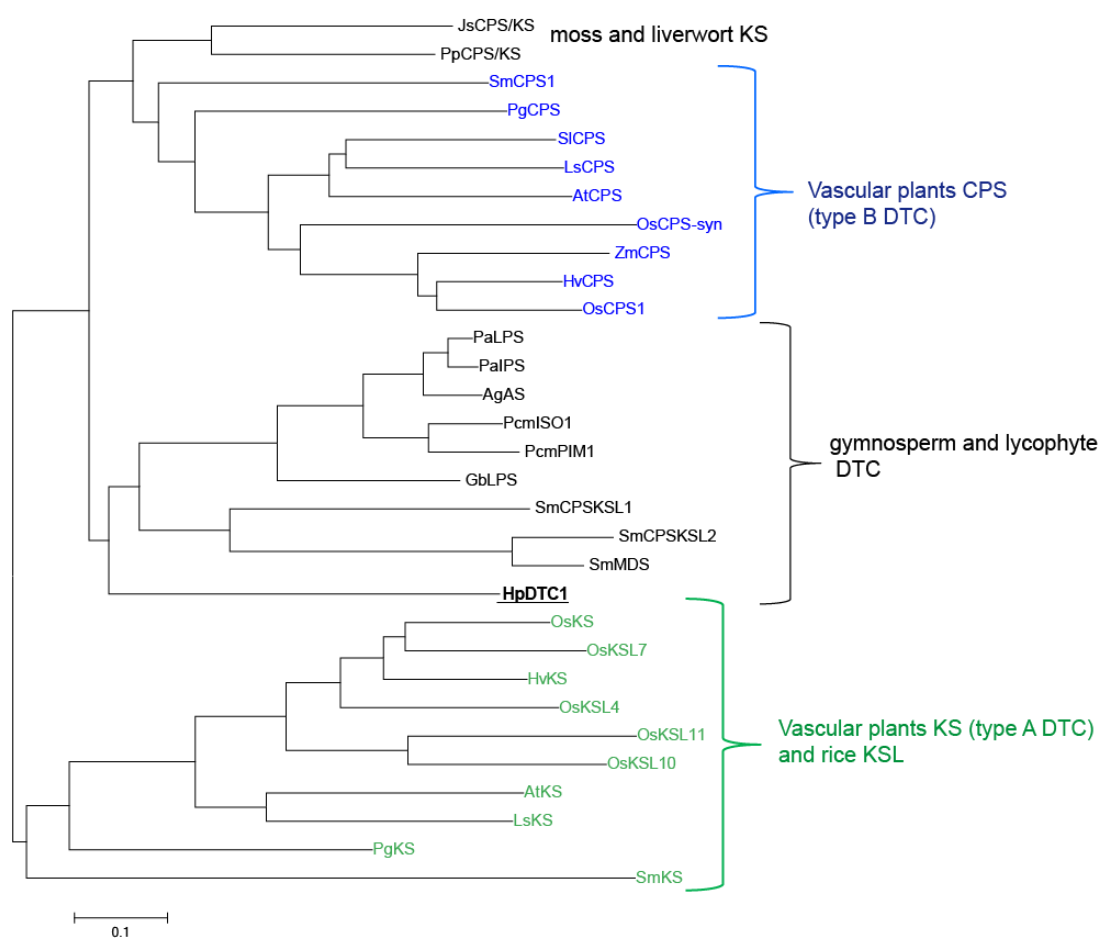

**Supplementary Figure S2. Phylogenetic tree of plant diterpene cyclases.**

The tree was constructed using the bootstrap neighbour joining method from alignment with the ClustalW program. HpDTC1 belongs to the gymnosperm and lycophyte bifunctional diterpene cyclases for specialized diterpene biosynthesis.

|           | ACCESSION    | Name                                                                  |
|-----------|--------------|-----------------------------------------------------------------------|
| PpCPS/KS  | AB302933.1   | ent-kaurene synthase [ <i>Physcomitrella patens</i> ]                 |
| JsCPS/KS  | BAJ39816     | ent-kaurene synthase [ <i>Jungermannia subulata</i> ]                 |
| SmCPS1    | J9QS23       | Copalyl diphosphate synthase 1, SmTPS9                                |
| PgCPS     | ADB55707     | ent-copalyl diphosphate synthase [ <i>Picea glauca</i> ]              |
| SICPS     | NP_001234008 | copalyl diphosphate synthase [ <i>Solanum lycopersicum</i> ]          |
| LsCPS     | BAB12440     | copalyl diphosphate synthase No1 [ <i>Lactuca sativa</i> ]            |
| AtCPS     | NP_192187    | Ent-copalyl diphosphate synthase [ <i>Arabidopsis thaliana</i> ]      |
| OsCPS-syn | BAD42451     | syn-CDP synthase [ <i>Oryza sativa Japonica Group</i> ]               |
| ZmCPS     | AAT70083     | ent-copalyl diphosphate synthase [ <i>Zea mays</i> ]                  |
| HvCPS     | AAT49065     | copalyl diphosphate synthase-like protein [ <i>Hordeum vulgare</i> ]  |
| OsCPS1    | BAD42449     | ent-copalyl diphosphate synthase [ <i>Oryza sativa</i> ]              |
| PaLPS     | ADZ45517     | levopimaradiene/abietadiene synthase [ <i>Picea sitchensis</i> ]      |
| PaIPS     | ADZ45512     | isopimaradiene synthase [ <i>Picea sitchensis</i> ]                   |
| AgAS      | AAK83563     | abietadiene synthase [ <i>Abies grandis</i> ]                         |
| PcmISO1   | M4HYP3       | Monofunctional isopimaradiene synthase [ <i>Pinus contorta</i> ]      |
| PcmPIM1   | M4HYC8       | Monofunctional pimaradiene synthase [ <i>Pinus banksiana</i> ]        |
| GbLPS     | Q947C4       | Levopimaradiene synthase [ <i>Ginkgo biloba</i> ]                     |
| SmCPSKSL1 | AEK75338     | labda-7,13E-dien-15-ol synthase [ <i>Selaginella moellendorffii</i> ] |

|           |          |                                                            |
|-----------|----------|------------------------------------------------------------|
| SmCPSKSL2 | BAP19109 | sandaracopimaradiene synthase [Selaginella moellendorffii] |
| SmMDS     | BAL41682 | mltiradiene synthase [Selaginella moellendorffii]          |
| OsKS      | AAQ72559 | ent-kaurene synthase 1A [Oryza sativa]                     |
| OsKSL7    | Q00G37   | Ent-cassa-12,15-diene synthase [Oryza sativa]              |
| HvKS      | AAT49066 | ent-kaurene synthase-like protein 1 [Hordeum vulgare]      |
| OsKSL4    | Q0JEZ8   | Syn-pimara-7,15-diene synthase [Oryza sativa]              |
| OsKSL11   | Q1AHB2   | Stemod-13(17)-ene synthase [Oryza sativa]                  |
| OsKSL10   | ABH10735 | ent-sandaracopimaradiene synthase [Oryza sativa ]          |
| AtKS      | AAC39443 | ent-kaurene synthase [Arabidopsis thaliana]                |
| LsKS      | BAB12441 | ent-kaurene synthase No1 [Lactuca sativa]                  |
| PgKS      | ADB55711 | ent-kaurene synthase [Picea glauca]                        |
| SmKS      | BAP19110 | ent-kaurene synthase [Selaginella moellendorffii]          |

---

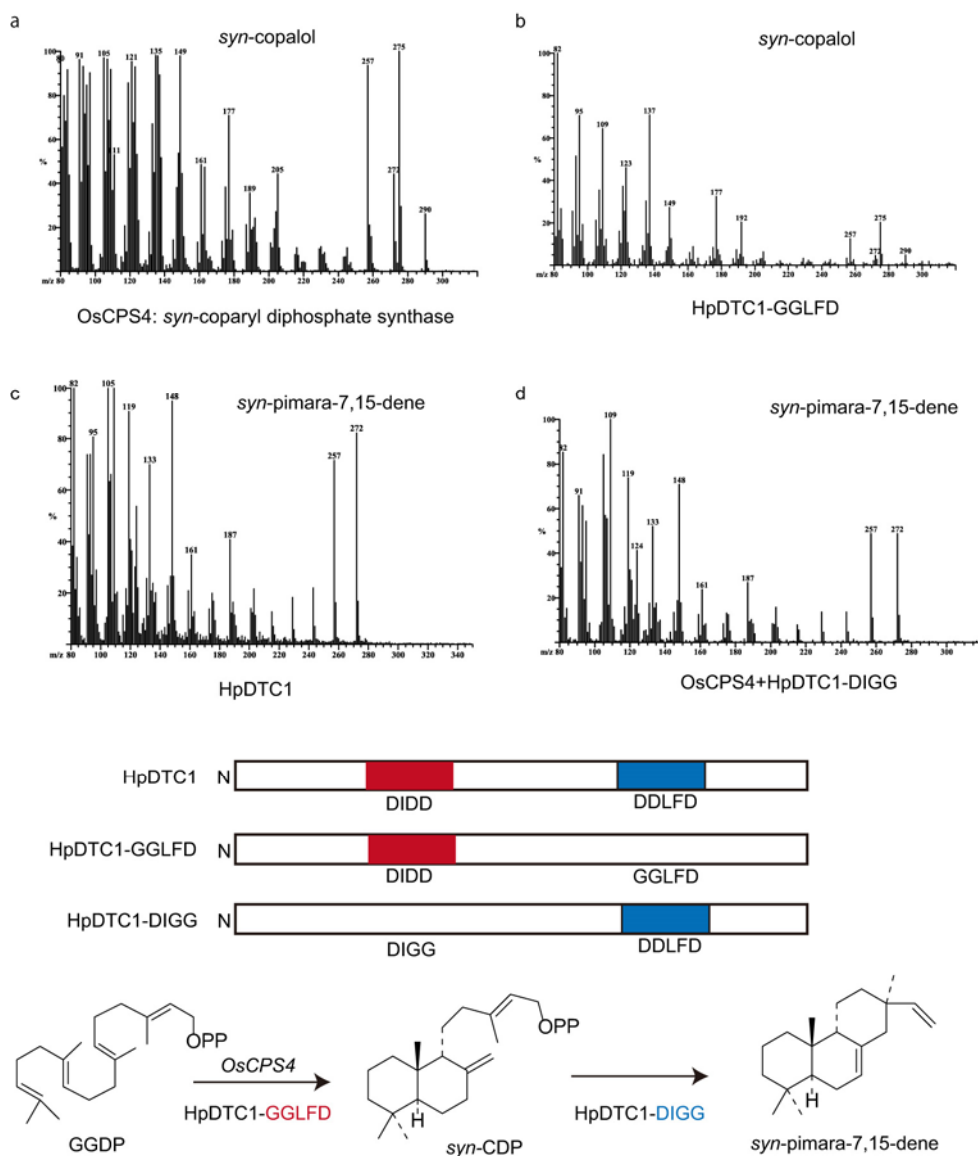

**Supplementary Figure S3. GC-MS spectra of enzymatic products of recombinant HpDTC1 mutant enzymes.**

(a) *syn*-copalol, product of OsCPS4. (b) The product of the HpDTC1-GGLFD mutant enzyme was identical to *syn*-copalol. (c) *syn*-pimara-7,15-diene, HpDTC1 product. (d) The reaction product from OsCPS4 and the HpDTC1-DIGG mutant enzyme was identical to *syn*-pimara-7,15-diene. The reaction product, *syn*-CDP, in (a and b) was dephosphorylated by calf intestinal alkaline phosphatase.

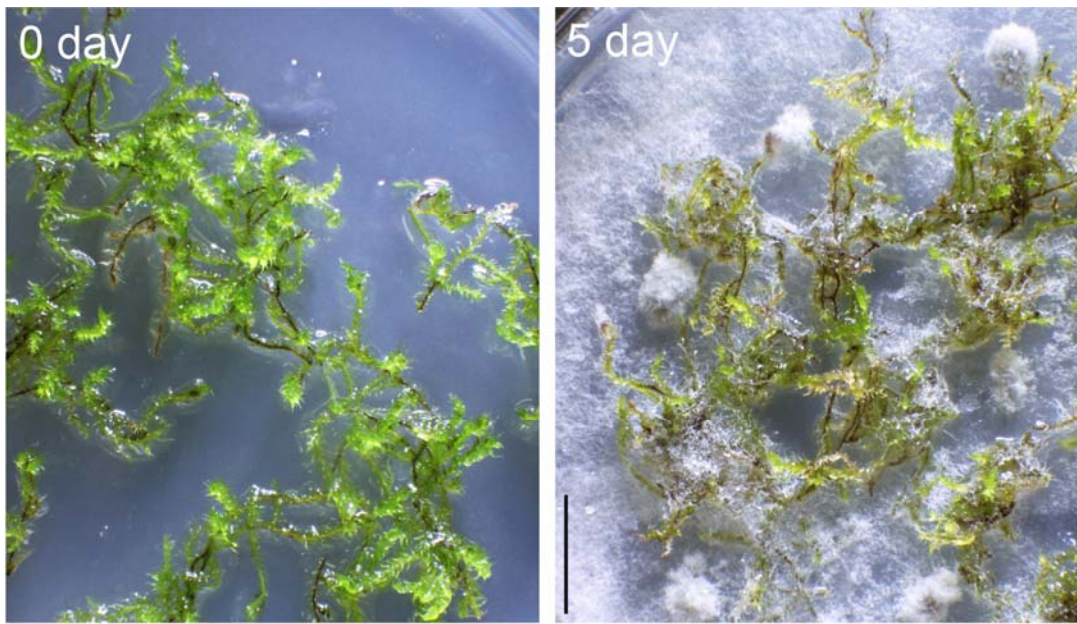

**Supplementary Figure S4. Photograph of *Botrytis cinerea* infected *Hypnum plumaeforme*** *Hypnum plumaeforme* was cultured at 24 °C for 5 days after inoculation with *Botrytis cinerea* mycelia. Scale bar: 10 mm.

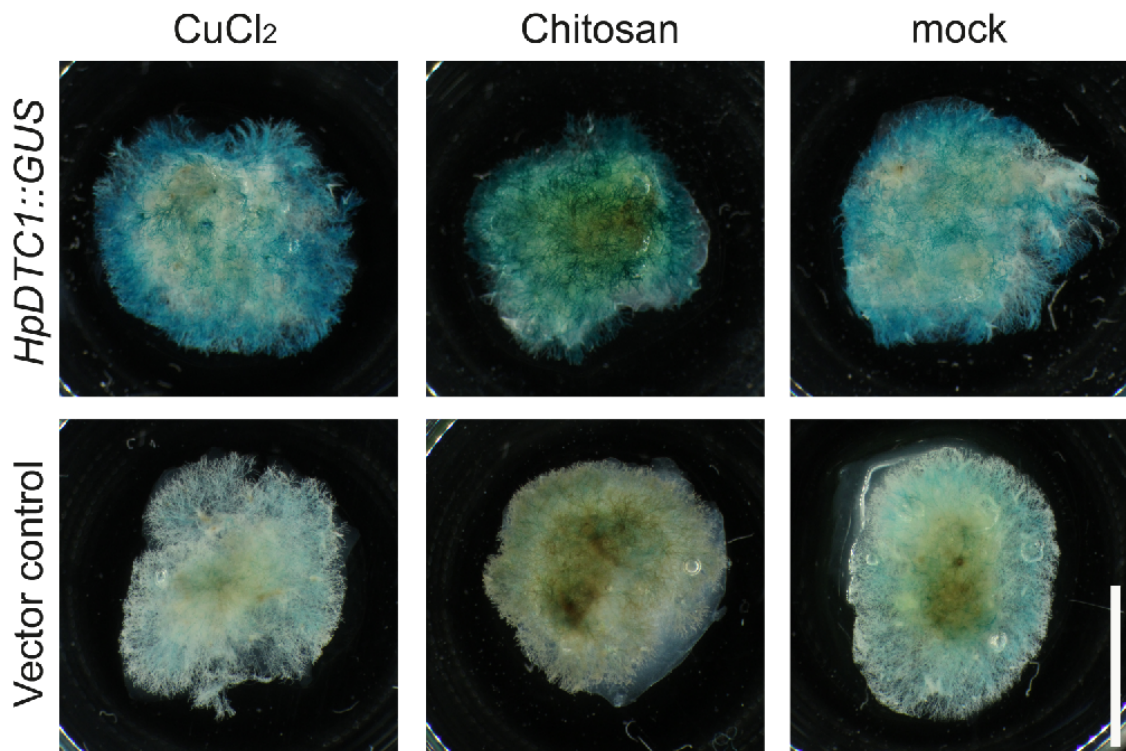

**Supplementary Figure S5. *HpDTC1::GUS* reporter gene expression in protonema cells of *P. patens*.** Protonema colonies of *HpDTC1::GUS* and vector control lines were incubated with 500  $\mu$ M CuCl<sub>2</sub> and chitosan (500  $\mu$ g/ml) for 24 h and then histochemically stained with X-Gluc. Scale bar: 5 mm.



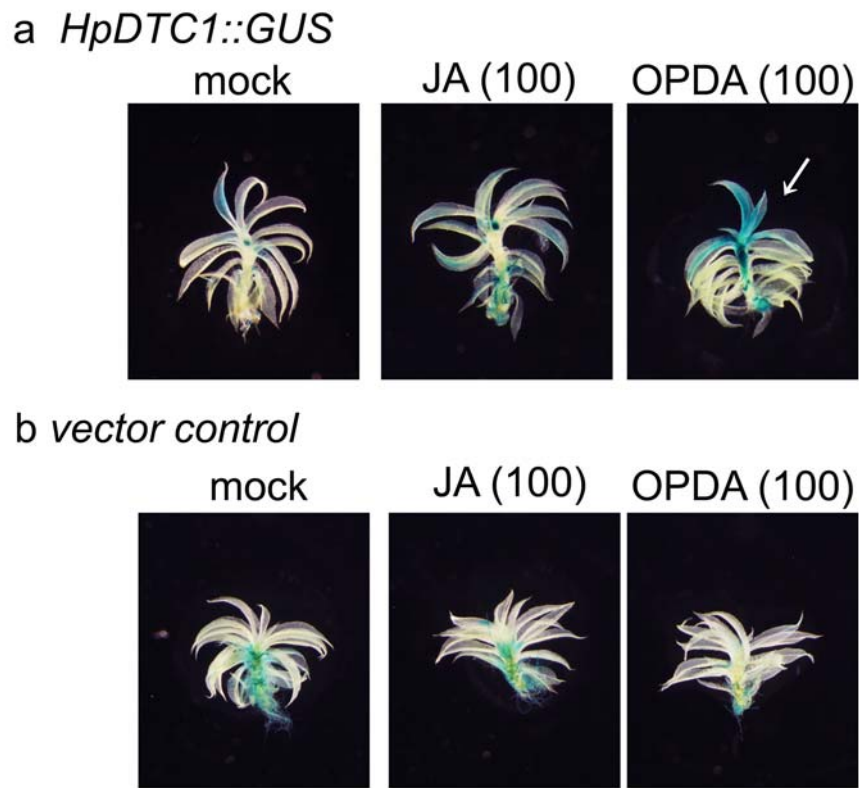

**Supplementary Figure S6. The effects of jasmonate and 12-oxo-phytodienoic acid on *HpDTC1::GUS* expression.**

After 24 h treatment with jasmonate (JA) and 12-oxo-phytodienoic acid (OPDA), *HpDTC1::GUS* reporter expression was visualized by X-gluc. (a) OPDA induced *HpDTC1::GUS* reporter expression, but JA did not. (b) JA and OPDA did not affect GUS expression in the control line. The values in parentheses represent the concentration ( $\mu\text{M}$ ).



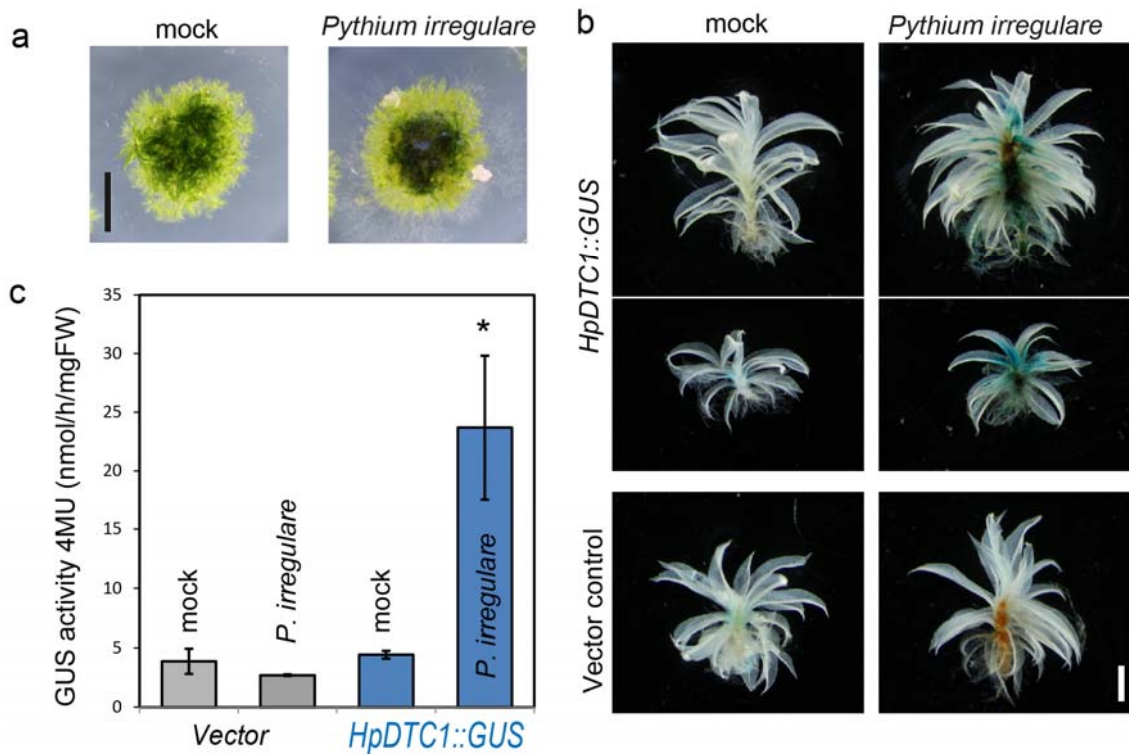

**Supplementary Figure S7. The *HpDTC1::GUS* reporter gene was induced by *Pythium irregulare* infection in *P. patens* gametophores.**

(a) Mycelia of *Pythium irregulare* MAFF 237501 were inoculated onto colonies of *HpDTC1::GUS* and vector control lines and then plates were incubated for 4 days. Scale bar: 5 mm. (b) The *HpDTC1::GUS* plants were histochemically stained by X-gluc. Scale bar: 1 mm. (c) The quantitative data for *HpDTC1::GUS* reporter induction by *P. irregulare* infection after 4 days incubation. The GUS activity was fluorometrically determined. Data are presented as mean  $\pm$  standard deviation of biological replicates. ( $n=5-8$ ,  $*p < 0.01$ ).

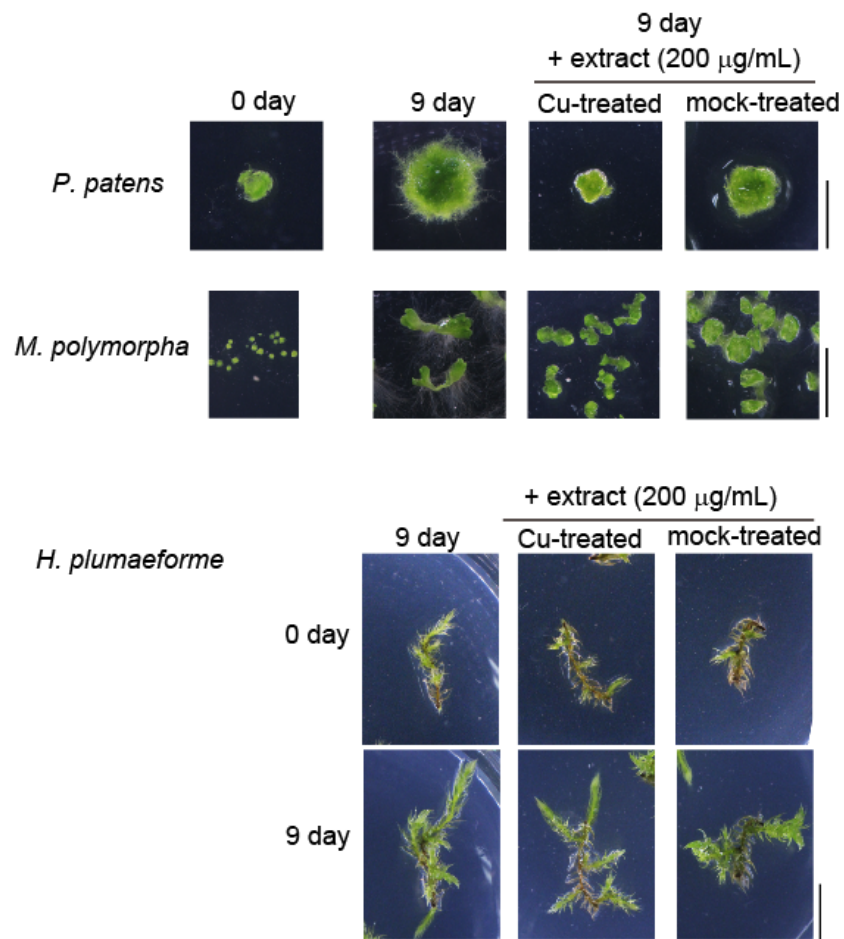

**Supplementary Figure S8. Allelopathic activity of *H. plumaeforme* extracts on the growth of the moss *P. patens* and liverwort *M. polymorpha*.**

The acetone extract was prepared from *H. plumaeforme* gametophores treated with or without 500 µM CuCl<sub>2</sub>. The plants were cultured on BCDATG agar medium containing the extract (200 µg/mL) and then photographs were taken on the indicated days. Scale bars: 5 mm.

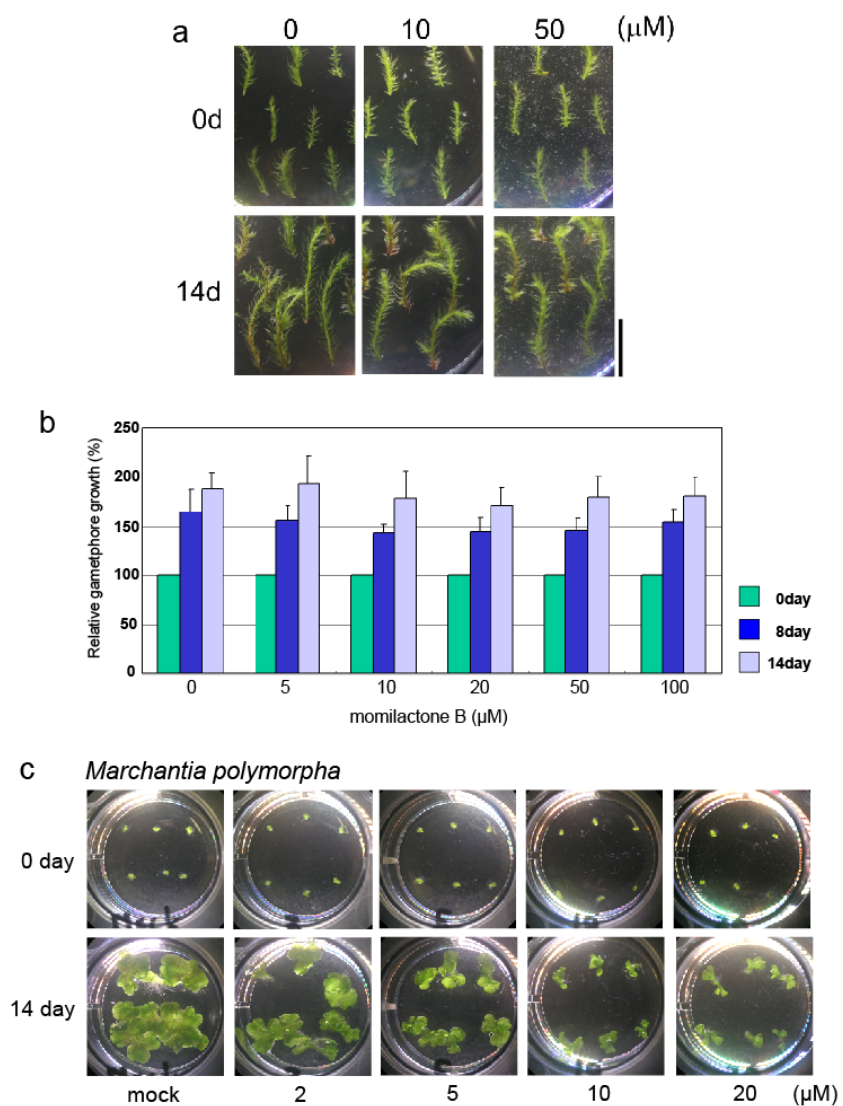

**Supplementary Figure S9. Allelopathic activity of momilactone B on the growth of *H. plumaeforme* and liverwort *M. polymorpha*.**

(a) Photograph of *H. plumaeforme* gametophores grown on BADATG agar plates containing momilactone B (10 and 50  $\mu\text{M}$ ). (b) The growth of *H. plumaeforme* was recorded after 8 and 14 days incubation. The values shown are the relative length of gametophores at 0 days (100%). Inhibitory effects of momilactone B on the growth was not observed at 100  $\mu\text{M}$ . (c) *M. polymorpha* was grown on M51 agar medium containing momilactone B and cultured for 14 days. Momilactone B showed potent inhibitory activity on the growth of *M. polymorpha* at 2-5  $\mu\text{M}$ .

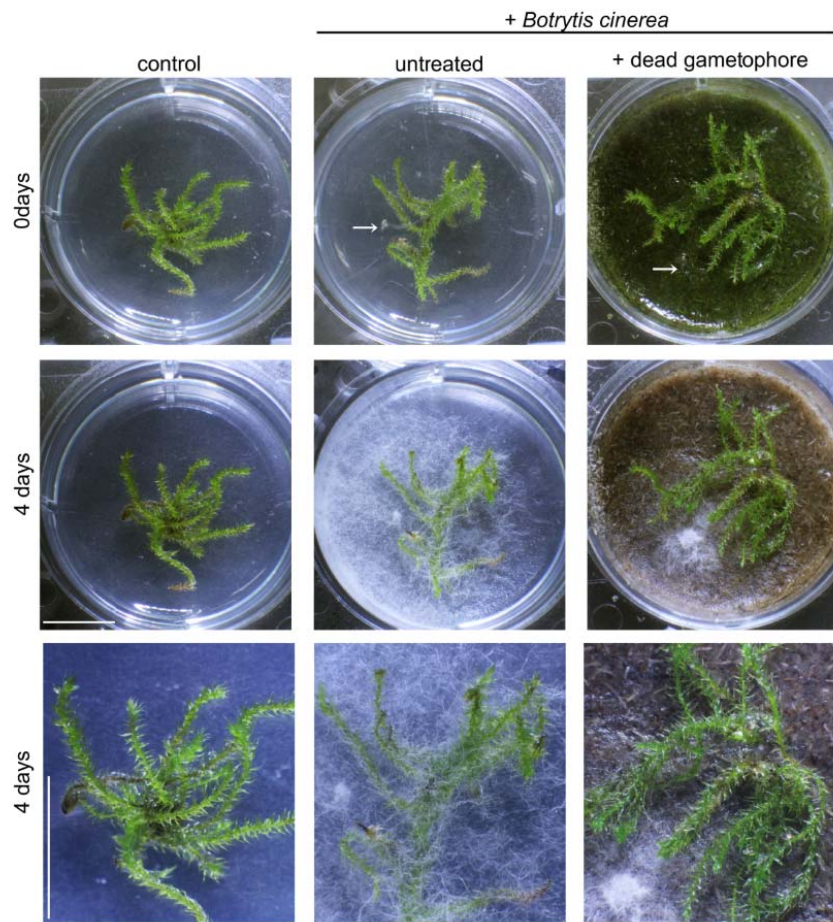

**Supplementary Figure S10. The effects of dead gametophytes of *H. plumaeforme* on the growth of *B. cinerea*.**

Mycelia were inoculated onto BCDATG agar plates containing the dried gametophores of *H. plumaeforme* (10% w/v) and then fresh *H. plumaeforme* gametophores were placed on the plate. The photograph was taken after 4 days incubation. Scale bar: 10 mm.

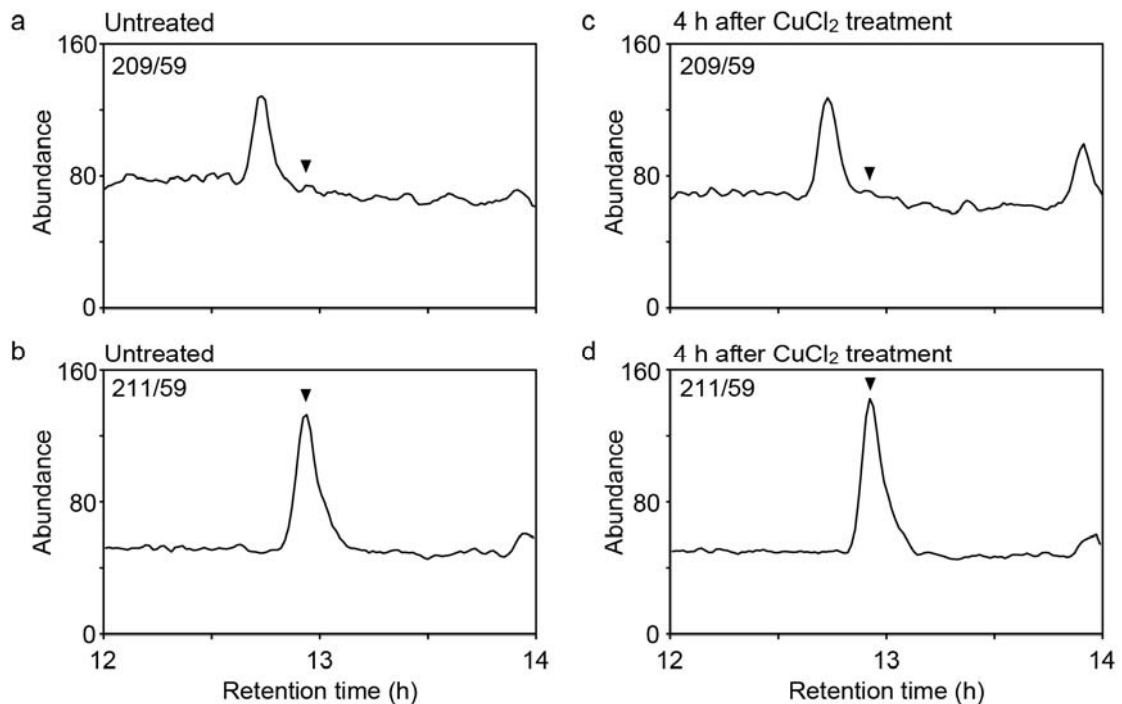

**Supplementary Figure S11. Measurements of endogenous jasmonic acid in *H. plumaeforme*.**

Moss samples (about 100 mg fresh weight) were homogenized and suspended in 2 mL 80% (v/v) methanol. After adding 5 ng [ $^2\text{H}_2$ ]-JA as an internal standard, the supernatant was loaded onto a Bond Elut C18 column (100 mg, 3 mL; Agilent, CA), which had been sequentially pre-washed with 3 mL each of methanol and water and equilibrated with 3 mL 80% (v/v) methanol, which was followed by elution with 2 mL 80% (v/v) methanol. The flow-through and eluted fractions were collected together and concentrated to a volume of about 0.5 mL *in vacuo*. The concentrated samples were subjected to liquid chromatography with electrospray ionization tandem mass spectrometry (LC-ESI-MS/MS) to quantify JA accumulation as previously described in Tamiru et al., A chloroplast-localized protein, LESION AND LAMINA BENDING, affects defence and growth responses in rice. *New Phytol.* 2016 doi: 10.1111/nph.13864. (a, c) SEM chromatogram ( $m/z$  209>59) corresponding to the fragment ion from endogenous JA in untreated sample (b, d) SEM chromatogram ( $m/z$  211>59) corresponding to the fragment ion from the internal standard [ $^2\text{H}_2$ ]-JA in 4h-treated sample for 4 h. A black arrow indicates the peak derived from JA. The endogenous JA level in *H. plumaeforme* was lower than the detection limit of our analysis system (<0.5 ng/gFW).

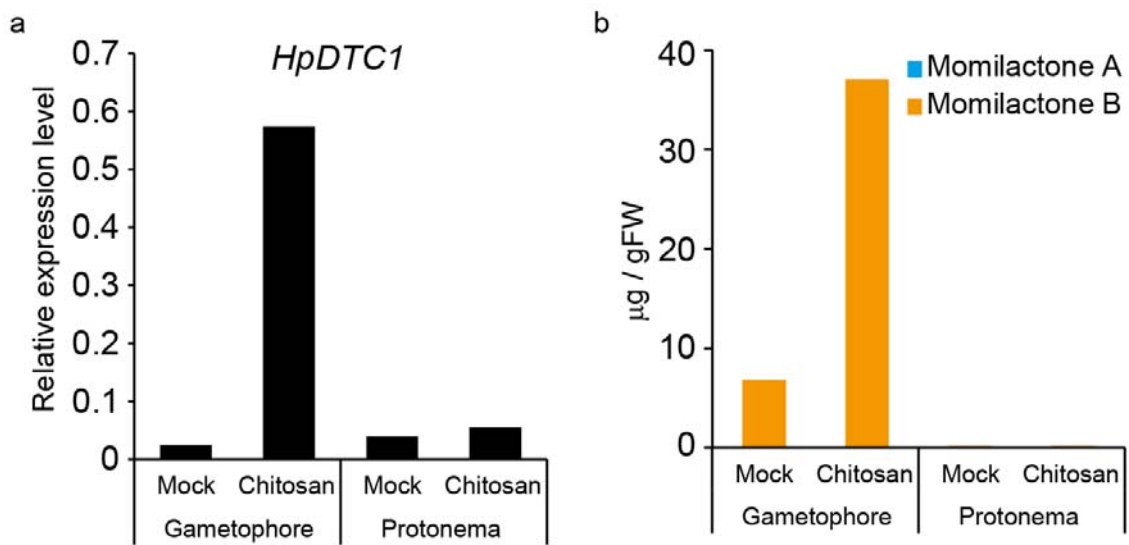

**Supplementary Figure S12. *HpDTC1* expression and production of momilactones are specifically induced in the gametophores, but not in the protonema cells of *H. plumaeforme*.**

(a) qRT-PCR was performed using *HpDTC1* specific primers with total RNA from *H. plumaeforme* gametophores and protonema cells treated with chitosan (500 μg/mL) for 6 h. (b) Momilactones A and B in *H. plumaeforme* gametophores and protonema cells treated with chitosan (500 μg/mL) for 6 h were measured by LC-MS/MS. In protonema cells, *HpDTC1* was not induced by chitosan treatment and consequently momilactones did not accumulate.



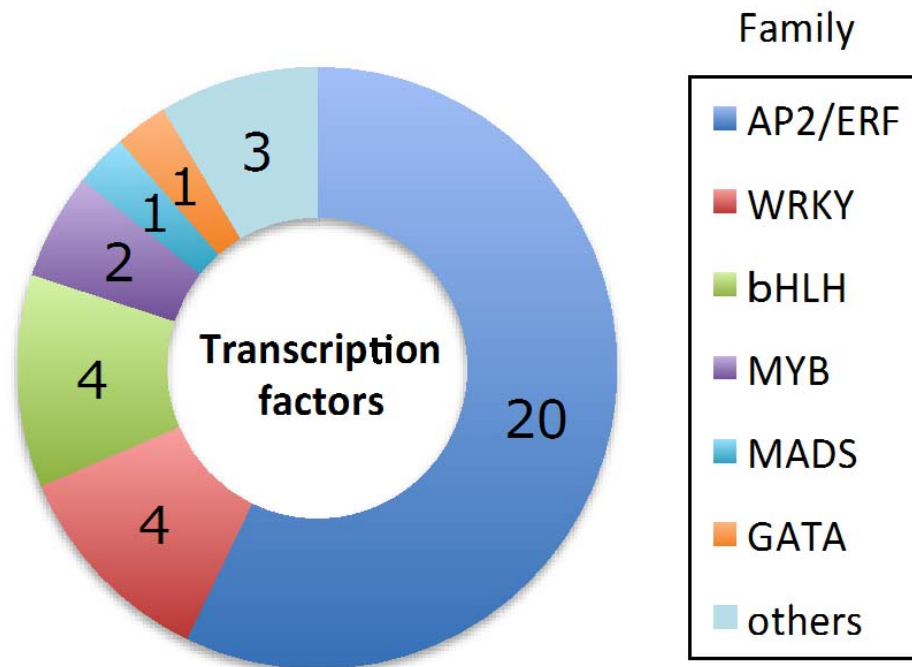

**Supplementary Figure S13. *H. plumaeforme* transcription factors induced by CuCl<sub>2</sub> treatment.** Forty-two genes up-regulated more than 5-fold compared to untreated samples are categorized by types of families.



**Supplementary table S1** List of PCR primers

|                                          |                                                                                              |                                                                                                      |
|------------------------------------------|----------------------------------------------------------------------------------------------|------------------------------------------------------------------------------------------------------|
| HpDTC1_cDNA<br>internal fragment         | HpDTC1-FR1-Fd<br>HpDTC1-FR1-Rv                                                               | AGAAGACAAGAATACCTGGATAGAGACGAC<br>TTTGGACATCGTGCTGGACTTCA                                            |
| HpDTC1-RACE<br>GSP primer for 5'-<br>end | HpDTC2-RACE5'-116<br>HpDTC2-RACE5'-266                                                       | GGAAACTCGGGTTCGTGAACTCCAGATAGC<br>TCTTTGCACACTGTCACTTCCCCTGTCCC                                      |
| HpDTC1-RACE<br>GSP primer for 3'-<br>end | HpDTC2-RACE3'-1929<br>HpDTC2-RACE3'-2098                                                     | TGTCGCAACTGGATTCCCCTGGTGAAGC<br>CGGCATTGACTACTGAAATCGAGAAGATGC                                       |
| Cloning for<br>HpDTC1_ORF                | HpDTC1_cDNA Fd<br>HpDTC1_cDNA Rv                                                             | TTATCGATGCAAAAGCAGTGGTTAG<br>AACGAACATTTTGGGACTCTGGAACGCA                                            |
| TAIL AD primers                          | TAIL-P1<br>GSP1-1                                                                            | NGTCGASWGANAWGAA<br>TAGAGTGTGAGTGATTCTGTCTGTA                                                        |
| TAIL GSP primers                         | GSP1-2<br>GSP1-3                                                                             | CCCAAGAACCATCTTCAAACCTG<br>CATTGCAGAGCTTGAGGAAACT                                                    |
| TAIL AD primers                          | TAIL-P2<br>GSP2-1                                                                            | GTNCGASWCANAWGTT<br>TGAACCTACGAAAGTATCAACCGATC                                                       |
| TAIL GSP primers                         | GSP2-2<br>GSP2-3                                                                             | TACATTCCGACCCAATGTGGAG<br>CTGCGTAAGTTTCTCAAGCTC                                                      |
| TAIL AD primers                          | TAIL-P1<br>GSP3-1                                                                            | NGTCGASWGANAWGAA<br>ATGAGAGCTGAGTGGCCATTG                                                            |
| TAIL GSP primers                         | GSP3-2<br>GSP3-3                                                                             | CACGGTTGGTTCATTCTACTTCT<br>TTCCATAAAGGTCAGTCGGG                                                      |
| TAIL AD primers                          | TAIL-P2<br>GSP4-1                                                                            | GTNCGASWCANAWGTT<br>CCAAGGTCATTAAGGCAAGC                                                             |
| TAIL GSP primers                         | GSP4-2<br>GSP4-3                                                                             | GCTCCATTGACCGATAAACA<br>GTGGATGATTCTATTGGTTGAGA                                                      |
| TAIL AD primers                          | TAIL-P3<br>GSP5-1                                                                            | WGTGNAGWANCANAGA<br>GAGAATTACAACAAGAGAATTACCT                                                        |
| TAIL GSP primers                         | GSP5-2<br>GSP5-3                                                                             | CCAAGGTCATTAAGGCAAGC<br>GCTCCATTGACCGATAAACA                                                         |
| HpDTC1 promotor<br>cloning               | PR-InF-HpDTC1-Fd<br>PR-InF-HpDTC1-Rv                                                         | CTATAGGGGAAAGCTTAAAATAATGAAGAGTGGAGAGAGACTACAGT<br>GTGAATTCGAGCTCGGTACCGTCTCTATCCAGGTATTCTTGCTTTC    |
| HpDTC1-expression<br>vector              | HpDTC1-ORF-Fd<br>HpDTC1-ORF-Rv                                                               | GGCATATGGAGCTCGGTACCGCCGTCGACACAGAAGACAA<br>CGACAAGCTTGAATTCTCAGGCCACAGGCTCGA                        |
| HpDTC1 mutant<br>enzymes                 | double-mutation-A Fw<br>double-mutation-A Rv<br>double-mutation-B Fw<br>double-mutation-B Rv | GAAGAGCCCGCCACGAT<br>ATCGTGGGCGGCCCTCTTC<br>GGCGTACTTCAATGGCTTTCC<br>TATATCTTGCAAATCACCATCTTAGTCCATC |
| qRT-PCR primers                          | HpACT3-Fd<br>HpACT3-Rv<br>DTC1_for_RT-PCR-Fd<br>DTC1_for_RT-PCR-Rv                           | CGAGCAGCATGAAGATCAAG<br>GTAICTCGCTCTTCGCAATCC<br>TGCTGCTCAGCATGTATCGT<br>GGACTCTGGAACGCAAGACT        |
| HpDTC1::GUS                              | PR-DTC1-GUS-Fd<br>PR-DTC1-GUS-Rv                                                             | ATTCATGTTTTCTAGAAAAATAATGAAGAGTGGAGAGAG<br>CCGGGGGGGGGATCCTCCCTGGACATGAAGTTCGGTGTGC                  |
